1 ***H2A.X* mutants exhibit enhanced DNA demethylation in *Arabidopsis thaliana***

2

3 Jennifer M. Frost<sup>1,6,†,\*</sup>, Jaehoon Lee<sup>2, †</sup>, Ping-Hung Hsieh<sup>1,7,†</sup>, Samuel J. H. Lin<sup>1,8,†</sup>, Yunsook

4 Min<sup>2</sup>, Matthew Bauer<sup>1</sup>, Anne M. Runkel<sup>1</sup>, Hyung-Taeg Cho<sup>2</sup>, Tzung-Fu Hsieh<sup>3,4</sup>, Yeonhee

5 Choi<sup>2,5,\*</sup> and Robert L. Fischer<sup>1,\*</sup>

6

7 <sup>1</sup>Department of Plant and Microbial Biology, University of California, Berkeley, CA, United

8 States

9 <sup>2</sup>Department of Biological Sciences, Seoul National University, Seoul, Korea.

10 <sup>3</sup>Department of Plant and Microbial Biology, North Carolina State University, Raleigh, NC,

11 United States

12 <sup>4</sup>Plants for Human Health Institute, North Carolina State University, North Carolina Research

13 Campus, Kannapolis, NC, United States

14 <sup>5</sup>Research Center for Plant Plasticity, Seoul National University, Seoul, Korea

15 <sup>6</sup>Present address: Genomics and Child Health, Queen Mary University of London, London,

16 United Kingdom

17 <sup>7</sup>Present address: DOE Joint Genome Institute, Lawrence Berkeley National Laboratory, 1

18 Cyclotron Road, Berkeley, CA, United States

19 <sup>8</sup>Present address: Section of Cell and Developmental Biology, Division of Biological

20 Sciences, University of California, San Diego, San Diego, CA, United States

21

22 † These authors contributed equally to this work

23 \* Correspondence:

24 Jennifer M. Frost\*

25 [j.frost@qmul.ac.uk](mailto:j.frost@qmul.ac.uk),

26 Yeonhee Choi\*

27 [yhc@snu.ac.kr](mailto:yhc@snu.ac.kr),

28 Robert L. Fischer\*

29 [rfischer@berkeley.edu](mailto:rfischer@berkeley.edu)

30

31 **Key words: Epigenetics, DNA demethylation, H2A.X, DEMETER, DNA damage**

32 **response, DNA glycosylase**

33

34 **Running title: hypomethylation in *h2a.x* mutant endosperm**

35

## 36 **Abstract**

37

38 *H2A.X* is an H2A variant histone in eukaryotes, unique for its ability to respond to DNA  
39 damage, initiating the DNA repair pathway. *H2A.X* replacement within the histone octamer is  
40 mediated by the FAcilitates Chromatin Transactions (FACT) complex, a key chromatin  
41 remodeler. FACT is required for DEMETER (DME)-mediated DNA demethylation at certain  
42 loci in *Arabidopsis thaliana* female gametophytes during reproduction, though it is not  
43 known how FACT targets DME sites. Here, we investigated whether H2AX is involved in  
44 DME- and FACT-mediated DNA demethylation during *Arabidopsis* reproduction. We show  
45 that *h2a.x* mutants are more sensitive to genotoxic stress, consistent with previous reports.  
46 *H2A.X* fused to the *Green Fluorescent Protein (GFP)* gene under the *H2A.X* promoter was  
47 highly expressed in newly developing *Arabidopsis* tissues, including in male and female  
48 gametophytes. We examined DNA methylation in *h2a.x* developing seeds using whole  
49 genome bisulfite sequencing, and found that CG DNA methylation in the developing  
50 endosperm, but not the embryo, is decreased genome-wide in *h2a.x* mutants, predominately  
51 in transposons and intergenic DNA. Hypomethylated sites overlapped 62 % with canonical  
52 DME loci. These data indicate that H2A.X is not required for DME function, but is important  
53 for DNA methylation homeostasis in the unique chromatin environment of *Arabidopsis*  
54 endosperm.

55

## 56 **Introduction**

57

58 DNA methylation regulates gene expression and silences transposable elements (TEs) in  
59 plants and vertebrates (Law and Jacobsen, 2010), and epigenetic reprogramming by DNA  
60 demethylation is vital for reproduction in mammals and flowering plants (Monk et al.,  
61 1987;Feng et al., 2010;Wu and Zhang, 2017;Parrilla-Doblas et al., 2019). In *Arabidopsis*  
62 *thaliana*, DNA demethylation during reproduction is catalyzed by the DNA glycosylase  
63 DEMETER (DME) (Choi et al., 2002). DME is a dual function glycosylase/AP lyase, which  
64 actively removes DNA methylation via the Base Excision Repair (BER) pathway (Gehring et  
65 al., 2006).

66 DME-mediated DNA demethylation occurs genome-wide at discrete loci that fall into two  
67 groups. The first consists of relatively euchromatic, AT-rich, small TEs that are nucleosome-  
68 poor, and generally interspersed with genes in chromosome arms (Ibarra et al., 2012). The

69 second group of loci requires the Facilitates Chromatin Transactions (FACT) complex for  
70 DME access, and are longer, heterochromatic TEs prevalent in pericentromeric, gene poor  
71 regions, enriched with heterochromatic histone marks and H1 linker proteins (Frost et al.,  
72 2018). During reproduction DME and DME-FACT mediated DNA demethylation occurs  
73 specifically in male and female gamete companion cells, the vegetative and central cells,  
74 respectively (Ibarra et al., 2012; Park et al., 2017), and is vital for *Arabidopsis* reproduction,  
75 whereby loss of maternal DME or FACT results in development abnormalities, loss of  
76 genomic imprinting and seed abortion (Choi et al., 2002; Gehring et al., 2006; Hsieh et al.,  
77 2009; Ikeda et al., 2011; Ibarra et al., 2012).

78 FACT is required for several other vital cellular functions, including transcription  
79 initiation and elongation, nucleosome assembly and disassembly, and for histone variant  
80 exchange, specifically of H2A.X (Belotserkovskaya et al., 2003; Heo et al., 2008; Formosa,  
81 2012; Piquet et al., 2018). In *Arabidopsis*, H2A.X is essential for the response to DNA  
82 damage, whereby the phosphorylation of its SQEF motif by Ataxia Telangiectasia Mutated  
83 (ATM) and ATR kinases, serves as a signal for recruitment of DNA repair and checkpoint  
84 proteins (Du et al., 2006; Heo et al., 2008; Dantuma and van Attikum, 2016). It is not known  
85 how FACT is recruited to DME target sites, and the apurinic/aprimidinic (AP) sites created  
86 during base-excision repair (BER) can lead to the formation of double strand breaks  
87 (Sczepanski et al., 2010). We therefore sought to explore whether recruitment of H2A.X to  
88 sites of DME activity during BER may provide a functional link between H2A.X, FACT and  
89 DME during *Arabidopsis* reproduction. In order to investigate this, we analyzed the  
90 expression and activity of *H2A.X* during *Arabidopsis* reproduction, finding that *H2A.X* is  
91 expressed throughout the plant, particularly in developing tissues and the male and female  
92 gametophytes. The loss of H2A.X does not impair DME-mediated DNA demethylation,  
93 instead leading to CG hypomethylation at DME sites, as well as other intergenic regions and  
94 transposable elements, specifically in the endosperm.

95

## 96 **Materials and Methods**

97

### 98 **Plant materials and growth conditions**

99 *Arabidopsis* seeds were bleached and sown onto Murashige and Skoog plates, followed by  
100 vernalisation in the dark at 4 degrees for 3 days, and two weeks growth in a light chamber,  
101 before transplantation onto soil. Seedlings were grown in a greenhouse with a long-day

102 photoperiod (16 h light, 8 h dark). Seed stocks of T-DNA insertion mutants (SALK\_012255 in  
103 HTA3 and SAIL\_382\_B11/CS873648 in HTA5, Figure 1A) in the Columbia-0 (Col-0)  
104 background were obtained from the ABRC stock center. Mutant alleles were, backcrossed five  
105 times to wild-type, and finally crossed to obtain double *hta3/hta3*; *hta5/hta5* null plants,  
106 designated *h2a.x*, as well as segregating wild-type siblings. Both T-DNA insertion alleles have  
107 been studied and validated in recent reports (Lorkovic et al., 2017; Waterworth et al., 2019).

108

### 109 **Edu cell proliferation assay**

110

111 5-ethynyl-2'-deoxyuridine (EdU) staining using an Invitrogen Click-iT™ EdU Alexa Fluor™  
112 488 HCS Assay (C10350) was performed to detect S phase cells. Seeds were grown in MS  
113 media vertically for 3 days. Seedlings were collected in MS solution containing 1μM Edu  
114 and incubated at 22°C for 30 minutes. And then, samples were fixed in 4% (w/v)  
115 formaldehyde solution in phosphate-buffered saline (PBS) with 0.1% Triton X-100 for  
116 30min, and washed three times with PBS each for 5 minutes. The samples were incubated in  
117 Edu detection cocktail solution at room temperature for 30 minutes in the dark, and washed  
118 with the Click-iT® rinse buffer and then three times with PBS. The photos were taken using  
119 confocal microscopy (LSM700, Zeiss).

120

### 121 **Propidium Iodide (PI) staining**

122

123 Propidium Iodide (P-4170, sigma) staining was used to detect cell death and show the  
124 anatomy of the roots. The samples were stained with working PI solution (5ml PI solution in  
125 1ml of distilled water) at room temperature for 30s and washed with distilled water on slide  
126 glass.

127

### 128 **Observation of root hair phenotypes**

129

130 Root hair phenotypes were observed under a stereomicroscope (M205 FA, Leica). Root hair  
131 length was measured as previously described by (Lee and Cho, 2006) with slight  
132 modifications. DAG3 seedling roots were photographed digitally using the stereomicroscope  
133 at 40X magnification. The hair length of nine consecutive hairs which protruded  
134 perpendicularly from each side of the root, for a total of 18 hairs from both sides of the root,

135 was calculated using ImageJ 1.50b software (National Institutes of Health).

136

### 137 ***H2A.X* expression localization**

138

139 HTA3 and HTA5 GFP fusion proteins were cloned alongside a hygromycin resistance cassette  
140 using a Gibson assay (Invitrogen) and F1 seeds screened on MS containing hygromycin. F1  
141 plants were screened manually using a fluorescence microscope and seeds collected from  
142 plants expressing GFP. F2 seeds were grown on hygromycin and selected if we identified  
143 segregation of the resistance allele, indicating the presence of a single copy transgene. F3  
144 plants were then used for confocal microscopy.

145

### 146 **DNA damage assay**

147

148 *Arabidopsis* seeds were planted on MS containing 0.5ug/ml bleomycin sulphate and grown  
149 vertically for 14 days under long day conditions, before measuring root length. MS without  
150 bleomycin was used as a control. Values are from three independent experiments each  
151 including 15 seedlings for each genotype. Truf leaf assay was performed as previously  
152 described with 10-day-old seedlings (Min et al., 2019).

153

### 154 **Isolation of *Arabidopsis* endosperm and embryos**

155

156 WT Col-0 and *h2a.x* mutant *Arabidopsis* flower buds were emasculated at flower stage 12-13  
157 using fine forceps and pollinated with *Ler* pollen 48 hours later. Eight to ten days after  
158 pollination (DAP) developing F1 seeds (linear to bending cotyledon stage) were immersed in  
159 dissection solution (filter-sterilized 0.3 M sorbitol and 5 mM pH 5.7 MES) on sticky tape and  
160 dissected by hand under a stereo-microscope using fine forceps (Fine Science Tools, Inox  
161 Dumont #5) and insect mounting pins. The seed coat was discarded, and debris removed by  
162 washing collected embryos or endosperm five to six times with dissection solution under the  
163 microscope.

164

### 165 **Bisulfite sequencing library construction**

166

167 As described previously, genomic DNA was isolated from endosperm and embryo (Hsieh et  
168 al., 2009). Bisulfite sequencing libraries for Illumina sequencing were constructed as in

169 (Ibarra et al., 2012) with minor modifications. In brief, about 50 ng of genomic DNA was  
170 fragmented by sonication, end repaired and ligated to custom-synthesized methylated  
171 adapters (Eurofins MWG Operon) according to the manufacturer's instructions for gDNA  
172 library construction (Illumina). Adaptor-ligated libraries were subjected to two successive  
173 treatments of sodium bisulfite conversion using the EpiTect Bisulfite kit (Qiagen) as outlined  
174 in the manufacturer's instructions. The bisulfite-converted library was split between two 50  
175  $\mu$ l reactions and PCR amplified using the following conditions: 2.5 U of ExTaq DNA  
176 polymerase (Takara Bio), 5  $\mu$ l of 10X Extaq reaction buffer, 25  $\mu$ M dNTPs, 1  $\mu$ l Primer 1.1  
177 and 1  $\mu$ l multiplexed indexing primer. PCR reactions were carried out as follows: 95°C for 3  
178 minutes, then 14-16 cycles of 95 °C 30 s, 65 °C 30 s and 72 °C 60 s. Enriched libraries were  
179 purified twice with AMPure beads (Beckman Coulter) prior to quantification with the Qubit  
180 fluorometer (Thermo Scientific) and quality assessment using the DNA Bioanalyzer high  
181 sensitivity DNA assay (Agilent). Sequencing on either the Illumina HiSeq 2000/2500 or  
182 HiSeq 4000 platforms was performed at the Vincent J. Coates Genomic Sequencing  
183 Laboratory at UC Berkeley.

184

### 185 **Bisulfite data analysis**

186

187 Sequenced reads were sorted and mapped to the TAIR8 Col-0 and Ler genomes in cases of  
188 seeds derived from Col x Ler crosses, or not sorted and mapped to TAIR8 Col-0. Gene and  
189 TE ends analysis and kernel density plots were generated as previously described (Ibarra et  
190 al., 2012), using only windows with at least 10 informative sequenced cytosines, and  
191 fractional methylation of at least 0.7 (CG), 0.4 (CHG) or 0.08 (CHH) in at least one of the  
192 samples being compared.

193

## 194 **Results**

195

### 196 ***Arabidopsis* seedlings lacking *H2A.X* have reduced DNA damage tolerance**

197

198 *H2A.X* is encoded by two genes in *Arabidopsis*, HTA3 (AT1G54690) and HTA5  
199 (AT1G08880). To investigate the effect of *H2A.X* mutations, we generated double mutants  
200 lacking both HTA3 and HTA5, verified the loss of transcripts using RT-PCR (Figure 1B) and  
201 analyzed the sporophytic and gametophytic phenotypes of *h2a.x* plants. *h2a.x* mutant allele  
202 segregation, plant morphology, growth rate and flowering time were all normal, except for a

203 significant increase in root hair length (Figure 1C,  $p < 0.0001$ ). *h2a.x* root hairs were ~15 %  
204 longer than WT three days after germination (DAG). We then tested whether cell  
205 proliferation was normal in *h2a.x*, using the 5-ethynyl-2'-deoxyuridine (EdU), a thymine  
206 analog, and click chemistry to measure incorporation in newly synthesized DNA (Kotogany  
207 et al., 2010). We did not observe a difference in EdU-stained cells between wild-type and  
208 *h2a.x* roots (Figure 1D), indicating that S-phase progression and cell proliferation are normal  
209 in *h2a.x* mutants. We also measured whether there was increased DNA damage in mutant  
210 roots using propidium iodide (PI) staining but did not observe any differences between WT  
211 and *h2a.x* (Figure 1E). These observations are consistent with mutant phenotypes observed in  
212 other DNA damage pathway genes, such as ATM or ATR kinases, which only exhibit a  
213 phenotype under growth conditions that promote DNA damage (Culligan et al., 2006).

214 We therefore grew *h2a.x* and segregating WT seeds on MS plates containing  
215 Bleomycin sulphate, which induces double strand breaks (DSB) in DNA. MS Bleomycin  
216 concentrations of 0.5 ng/ml were used to test primary root formation and 1 ug/ml to test true  
217 leaf formation, as root development was more sensitive to the drug. *h2a.x* mutant seedlings  
218 had a significant reduction in root length compared to WT (Figure 1F). True leaf formation  
219 rate is slightly reduced in *h2a.x* mutants (Figure 1G). These data are consistent with previous  
220 findings, also showing aberrant true leaf and root growth in *h2a.x* double mutant seedlings  
221 grown under genotoxic stress (Lorkovic et al., 2017). Thus, a lack of *H2A.X* resulted in  
222 increased sensitivity of developing tissues to DNA damaging agents, showing that *H2A.X* is  
223 required for the response to DNA damage in *Arabidopsis*.

224

Figure 1 – *h2a.x* mutant phenotype analysis

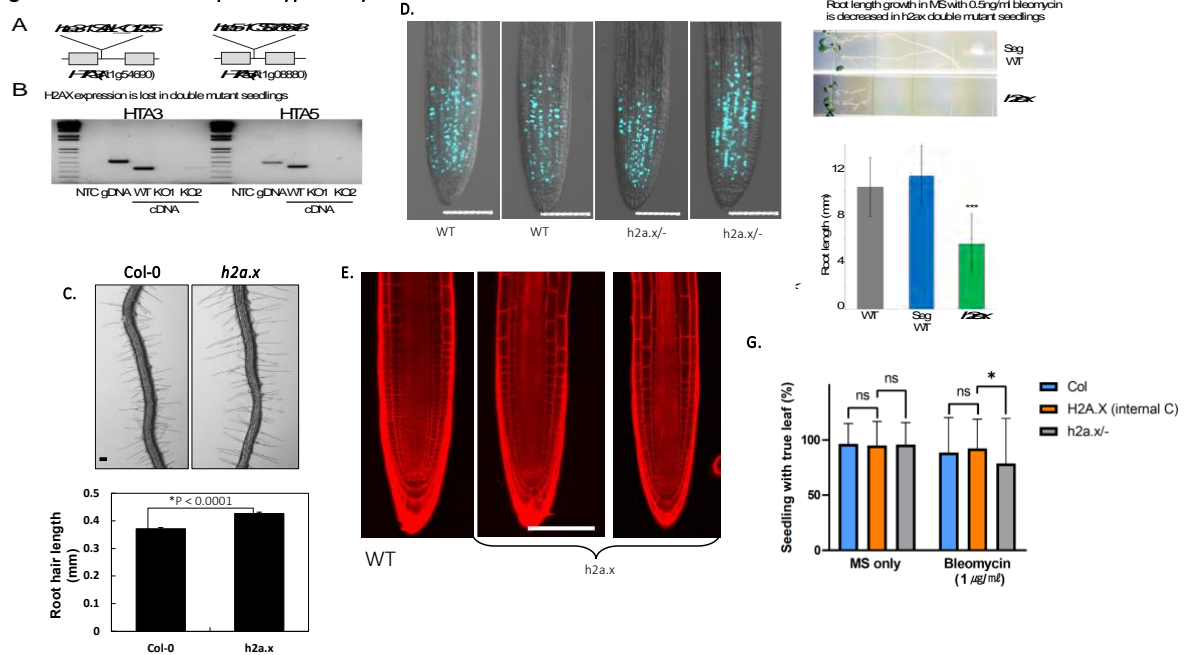

225

226 **Figure 1. *h2a.x* mutant phenotype analysis**

227 (A) HTA.3 and HTA.5 genomic loci, showing gene structure and location of T-DNA insertions. (B) qPCR  
 228 analysis of each mutant, showing cDNA-specific PCR amplification and loss of gene product in mutant seedling  
 229 tissue (C) Root hair phenotypes of wild-type (Col-0) and *h2a.x* mutant primary roots and length measurements  
 230 in mm. Data represent mean  $\pm$  SEM (n = 1,419 root hairs for Col-0 and 1,159 root hairs for *h2a.x* from 35 ~ 40  
 231 roots. The asterisk (\*) indicates a significant difference (Student's t test). Scale bar, 100  $\mu$ m. (D) EdU staining  
 232 of WT and *h2a.x* double mutant roots at 3 DAG. Scale bar, 100  $\mu$ m. (E) Propidium iodide (PI) staining of WT  
 233 and *h2a.x* double mutant roots. Scale bar, 100  $\mu$ m. (F) Aberrant root growth of *h2a.x* mutant seedlings when  
 234 grown in bleomycin MS. Root length measurements are in mm and the result of three replicate experiments,  
 235 each with 15 seedlings. (G) The formation of true leaves was slightly reduced in *h2a.x* mutant seedlings when  
 236 grown in bleomycin MS. Measurements are the result of duplicated experiments. Leaves counted are; 415 in MS  
 237 only and 203 in bleomycin MS for Col-0, 395 in MS only and 209 in bleomycin MS for H2A.X internal  
 238 segregated WT control, 406 in MS only and 202 in bleomycin MS for *h2a.x* mutant. The box height and whisker  
 239 length indicate the mean and standard deviation of each sample, respectively. The significance of differences  
 240 between samples was measured by the Kolmogorov-Smirnov test. ns, not significant; \* p=0.0440

241

242 ***H2A.X* is widely expressed across *Arabidopsis* tissues, including in gamete companion**  
 243 **cells**

244

245 To investigate the role of *H2A.X* in *Arabidopsis* development, we analyzed its expression  
 246 pattern in sporophytic and reproductive tissues. We generated translational fusion constructs  
 247 between the Green Fluorescent Protein (GFP) gene and the HTA3 and HTA5 genes,  
 248 including their promoter sequences, and introduced them into WT Col-0 *Arabidopsis* plants



249 using *Agrobacterium* mediated transfer, deriving three and four independent lines for each  
250 allele, respectively. GFP fluorescence was observed using confocal microscopy. Both HTA3  
251 and HTA5 were expressed in dividing cells of the sporophyte: First true leaves (Figure 2A  
252 and B), the floral meristem (Figure 2C), the adaxial leaf surface (Figure 2D and E), petal tips  
253 (Figure 2F), in root meristem and root tips (Figure 2G and H). In reproductive structures  
254 supporting gametophyte development, such as the ovule primordia (Figure 2I), ovules (Figure  
255 2J), and anthers (Figure 2K) both isoforms were expressed. In the next generation seed, both  
256 isoforms were present in the developing embryo, but not in the endosperm (Figure 2L and  
257 M). In each case, HTA5 expression was more prevalent and more widely expressed than  
258 HTA3. Conversely, in gametophytic development, both isoforms were again expressed but  
259 HTA3 was the dominant isoform (Figure 3). In the male gametophyte, both HTA3 and HTA5  
260 were present in the microspore prior to mitosis. After Pollen Mitosis 1 (PMI) HTA3 was  
261 expressed in the generative and vegetative nucleus of bicellular pollen, and following Pollen  
262 Mitosis II (PMII), in both sperm cells and the vegetative nucleus of mature, tricellular pollen  
263 (Figure 3A). HTA5 expression was also present in both the generative and vegetative  
264 nucleus following PMI, but was lost in the vegetative nucleus following PMII, in tricellular  
265 pollen (Figure 3B). In the female gametophyte, egg cell expression was visible for both  
266 HTA3 and 5, but was weak, conversely, HTA3 expression was very striking in the central  
267 cell, where it persisted following fertilization in the first cell divisions of the developing  
268 endosperm (Figure 3C and E). HTA5 expression was also observed in the central cell, but  
269 expression in the surrounding ovule tissue was more prominent for this isoform (Figure 3D).

## Figure 2

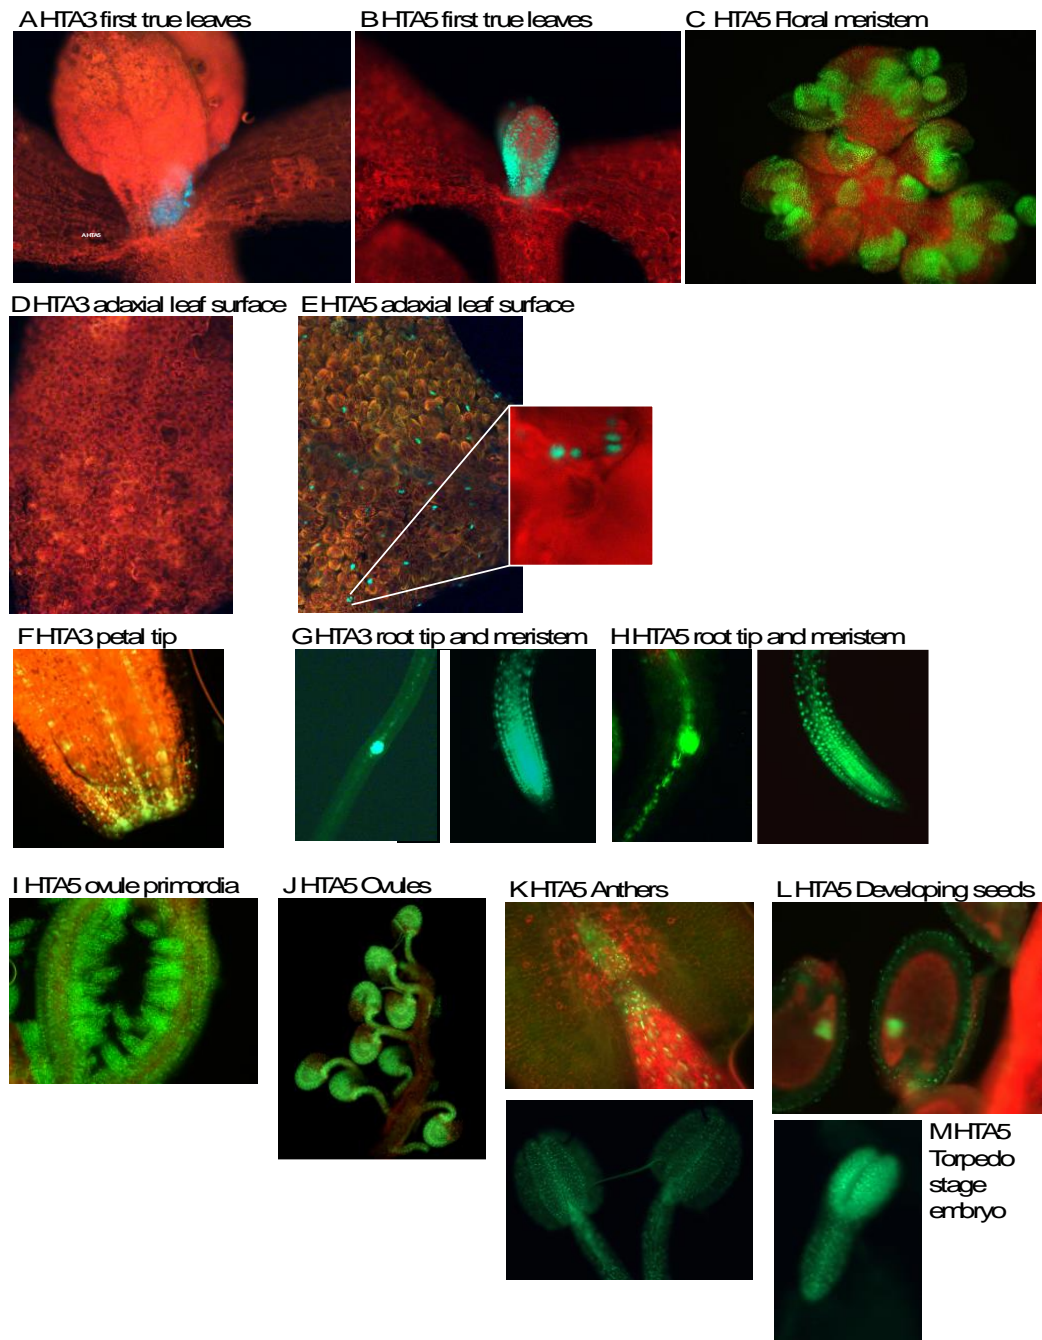

270

271 **Figure 2. HTA5 expression is more dominant in dividing cells of the sporophyte.**

272 First true leaves (A and B), the floral meristem (C), the adaxial leaf surface (D and E), petal tip  
273 meristem and root tips (G and H). In reproductive structures supporting gametophyte development such as the  
274 ovule primordia (I), ovules (J), and anthers (K), both isoforms were expressed. In the next generation seeds,  
275 both isoforms were present in the developing embryos (L and M).

276

## Figure 3

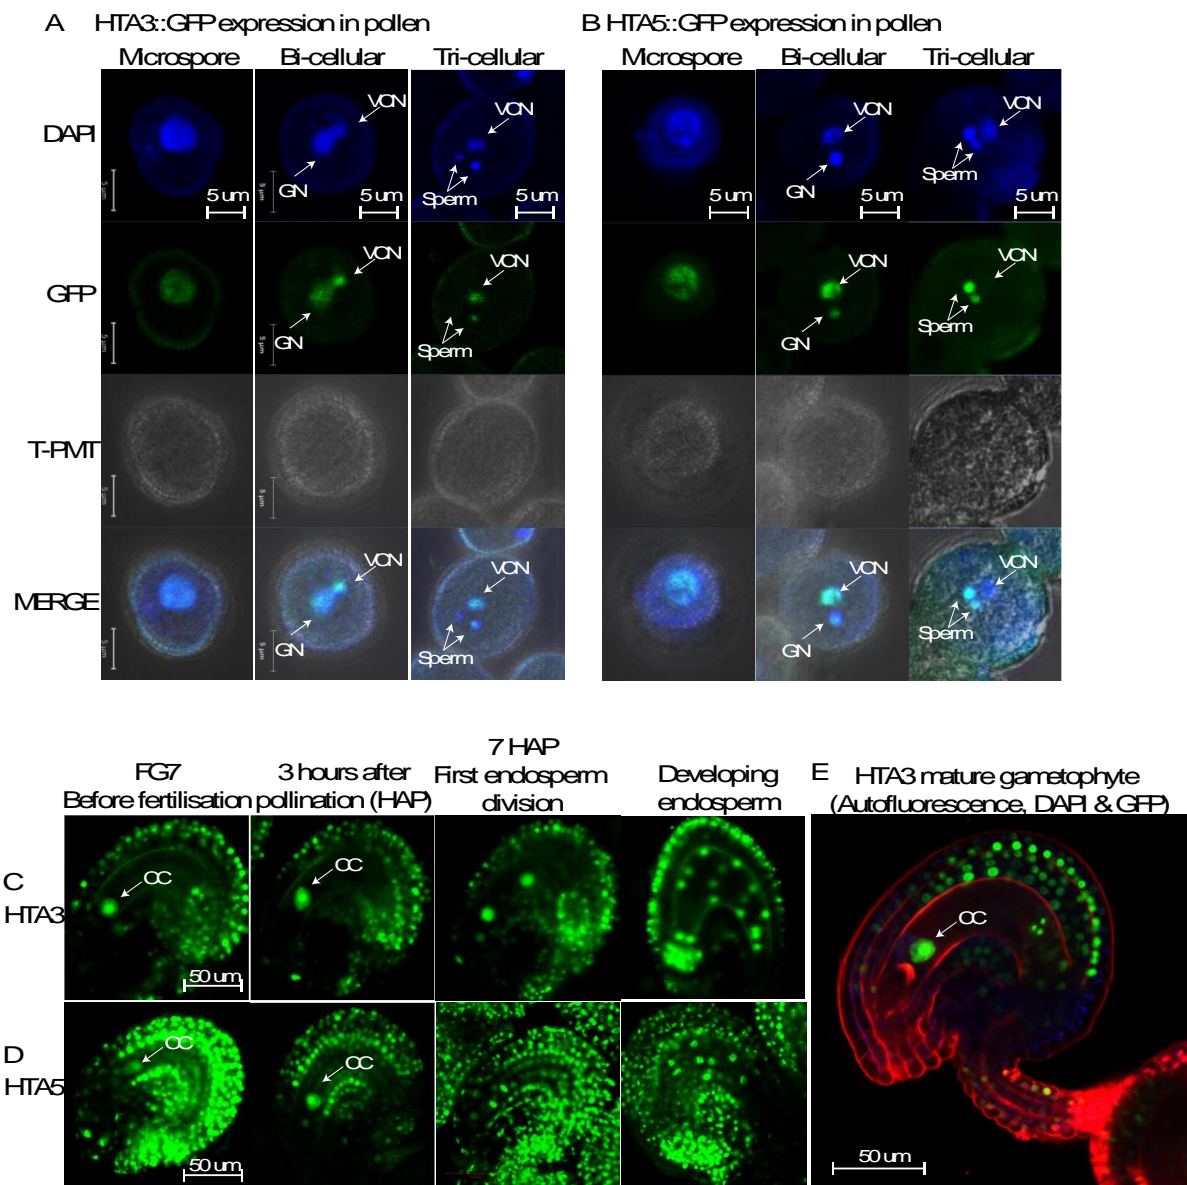

277

278 **Figure 3. *HTA3* expression is more dominant in gametophytic development.**

279 In the male gametophyte, both *HTA3* and *HTA5* are present in the microspore prior to mitosis. After Pollen

280 Mitosis I (PMI) *HTA3* was expressed in the generative and vegetative nucleus of bicellular pollen, and

281 following Pollen Mitosis II (PMII), in both sperm cells and the vegetative nucleus of mature, tricellular pollen

282 (A). *HTA5* expression was also present in both the generative and vegetative nucleus following PMI, but was

283 lost in the vegetative nucleus following PMII, in tricellular pollen (B). In the female gametophyte, egg cell

284 expression was visible for both *HTA3* and *HTA5*, but was weak. Conversely, *HTA3* expression was very striking

285 in the central cell, where it persisted following fertilization in the first cell divisions of the developing

286 endosperm (C and E). *HTA5* expression was also observed in the central cell, but expression in the surrounding

287 ovule tissue was more prominent for this isoform (D).

288

289 **DME does not regulate *H2A.X* expression in the *Arabidopsis* gametophyte**

290

291 Since *H2A.X* expression was prominent in the central and vegetative cells, specifically where  
292 DME-mediated demethylation and related BER activity takes place (Schoft et al., 2011; Park  
293 et al., 2017), we reasoned that *H2A.X* expression may be regulated by promoter DNA  
294 methylation, whereby DME might demethylate *HTA3* and *HTA5* promoter sequences in the  
295 gametophyte, increasing expression of these transcripts. To test this hypothesis, we utilized  
296 wild-type plants hemizygous for the *HTA3:GFP* transgene, for which strong *HTA3*  
297 expression could be observed in the central cell in ~50 % of the developing ovules (Figure 4).  
298 We crossed these plants with DME/*dme-2* heterozygotes to derive DME/*dme-2* plants that  
299 were also hemizygous for the *HTA3:GFP* transgene. A maternally inherited *dme-2* mutation  
300 generates embryo abortion and seed lethality, so analysis of seed development is generally  
301 only possible in DME/*dme-2* heterozygotes. We then analyzed the incidence of *HTA3:GFP*  
302 expression in DME/*dme-2* mutants and their segregating wild-type siblings in the F2  
303 population. In both DME/DME *HTA3:GFP*<sup>-</sup> (Figure 4A) and DME/*dme-2* *HTA3:GFP*<sup>-</sup> F2  
304 (Figure 4B) siblings we observed that ~50 % of the female gametophytes within ovules  
305 produced a strong GFP signal, indicating that the loss of DME did not alter the expression of  
306 *H2A.X* in the *Arabidopsis* female gametophyte. Consistent with this, when we compared  
307 promoter DNA methylation for the *H2A.X* variants in *Arabidopsis* wild-type and *dme-2*  
308 mutant central cells and endosperm (Hsieh et al., 2009; Park et al., 2016), we found that  
309 *H2A.X* promoter methylation was low in both tissues, and unchanged in the *dme-2* mutant  
310 (Supplementary Figure S1A and 1B). Other *H2A* variant gene loci were also unmethylated in  
311 both wild-type and *dme-2* mutant central cell and endosperm, except for *H2A.Z.4*, which  
312 exhibited promoter methylation in central cell and endosperm, that increased in *dme-2*  
313 mutants, a hallmark of a DME-target promoter (Supplementary Figure S1C).

Figure 4

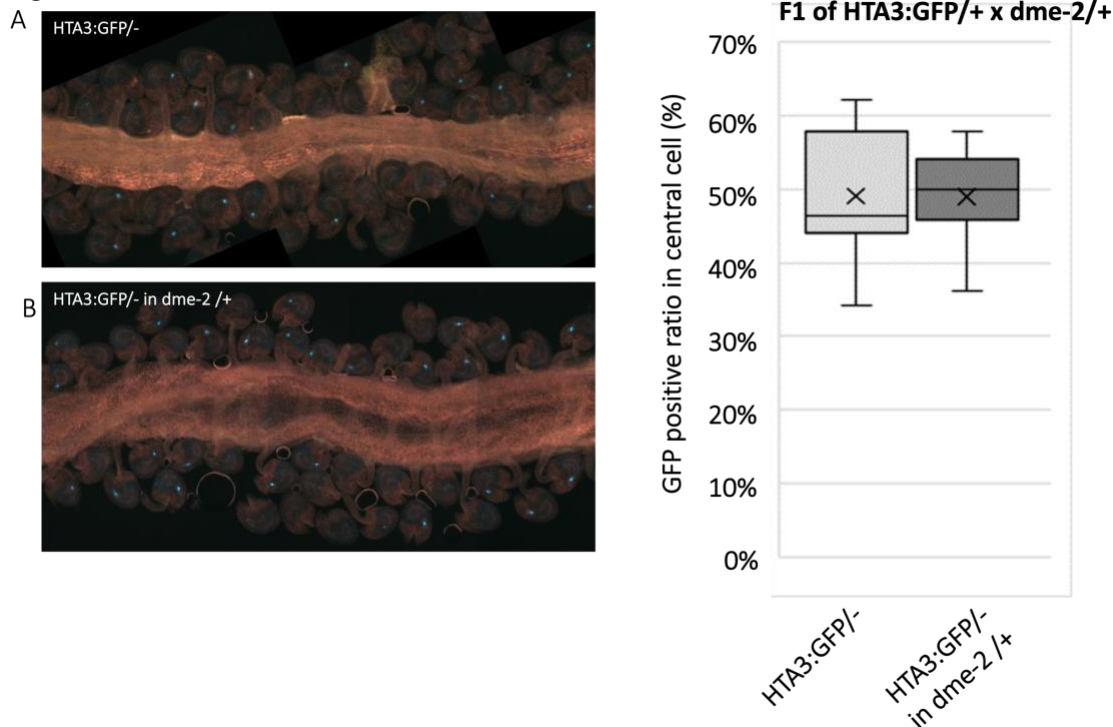

314

315 **Figure 4. *HTA.3:GFP* expression in WT and *dme-2* mutant central cells.**

316 (A) Confocal image of WT and *dme-2* mutant developing ovules expressing an *HTA.3:GFP* transgene.

317 Expression is confined to the central cell. (B) Box plot showing the distribution of GFP positive central cells

318 between WT and *dme-2* mutant ovules. There was no significant change in GFP positive central cells in

319 DME/*dme-2*. + mark in boxplot is mean of data. The line in a box is median (n = 554 mature ovules for

320 HTA3:GFP/- plants and 412 mature ovules for HTA3:GFP/- in DME/*dme-2* heterozygous plants. The values are

321 not significantly different by Student's *t* test.

322

323 ***h2a.x* mutant endosperm is hypomethylated genome-wide**

324

325 To investigate whether changes in DNA methylation were present in *h2a.x*, we carried out

326 genome-wide bisulfite sequencing (BS-seq) of manually dissected endosperm and embryo

327 from homozygous *h2a.x* mutant and wild-type F1 seeds and their resulting seedlings,

328 following self-pollination of homozygous *h2a.x* mutants and wild-type sibling plants. We

329 observed that embryo DNA methylation in the *h2a.x* mutant was unchanged from wild-type,

330 with the peak of fractional methylation difference at zero (Figure 5A). However, DNA

331 methylation of *h2a.x* mutant endosperm was reduced compared to wild-type in the CG

332 context, with the fractional methylation difference peak shifted to the left (Figure 5B).

333 To ascertain which endosperm loci were hypomethylated, we aligned our methylome data to

334 the 5' transcriptional start sites (TSS) and 3' transcriptional termination sites (TTS) of genes

335 and transposons, and also included methylome of *h2a.x* seedlings, which also showed that  
 336 hypomethylation was present only in endosperm, and although present in gene bodies and  
 337 intergenic regions, was most striking in transposon bodies, (Figure 5C and D). CHG and  
 338 CHH methylation was also reduced in endosperm transposon bodies (Supplementary Figure  
 339 S2A-D). In *h2a.x* embryos, CHH methylation in TEs was decreased (Figure S5D), although  
 340 embryo CHH methylation increases steadily with time during embryo development  
 341 (Papareddy et al., 2020) so it is possible the differences observed in embryos are a technical  
 342 difference, whereby mutant seeds were dissected earlier than wild-type.

Figure 5 – Methylome analysis of homozygous H2AX mutant seeds (selfed) and seedlings

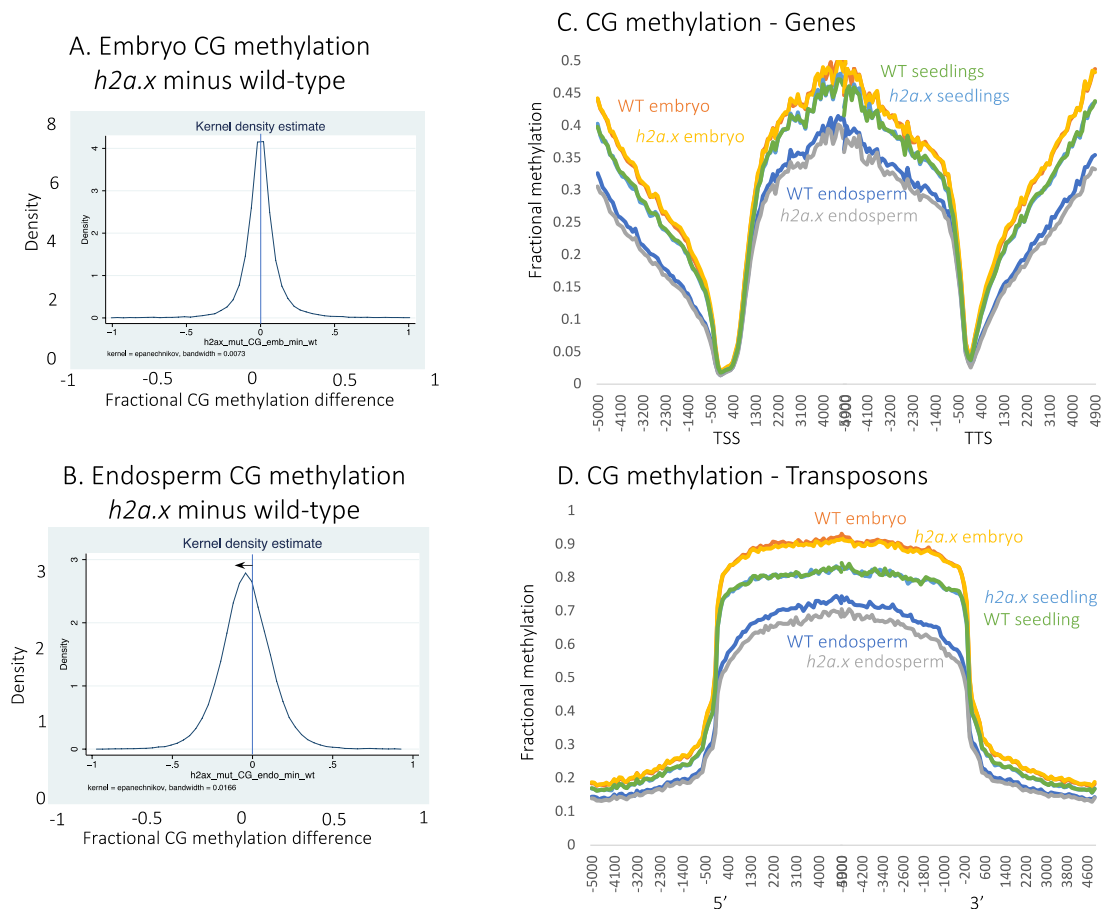

343  
 344 **Figure 5. Genome-wide methylation analysis of selfed double *h2a.x* mutant developing embryo,**  
 345 **endosperm and seedling.**  
 346 (A) Fractional methylation difference between *h2a.x* double mutant and WT CG methylation from embryo  
 347 (linear-bending cotyledon) is plotted, data in 50 bp windows with >10x sequence coverage. Data are from *h2a.x*  
 348 Col selfed plants and segregating wild type siblings. (B) As for A, but with endosperm. (C) Ends analysis of  
 349 *h2a.x* mutant genomic methylation in genes, with genes aligned according to their 5' and 3' ends. (D) Ends  
 350 analysis of *h2a.x* mutant genomic methylation in transposons, with transposons aligned according to their 5' and  
 351 3' ends.

352

353 **H2A.X hypomethylation overlaps DME target loci**

354

355 Inheritance of a loss-of-function maternal *dme* allele or a loss-of-function maternal *ssrpl*  
356 allele, which encodes one of the proteins in the FACT complex, results in a striking  
357 phenotype of seed abortion and developmental delay. Seed viability in homozygous *h2a.x*  
358 mutants, as well as in crosses from maternal *h2a.x* with wild-type Col-0 pollen, was normal,  
359 suggesting that DME- and DME-FACT- mediated DNA demethylation occurred normally in  
360 *h2a.x* mutant seeds, at least in the DME-regulated PRC2 genes critical for seed viability. In  
361 wild type female gametophytes, DME and DME-FACT mediated DNA demethylation leads  
362 to a hypomethylated endosperm compared to embryo (Hsieh et al., 2009;Ibarra et al.,  
363 2012;Park et al., 2016;Frost et al., 2018). To assess whether *h2a.x* hypomethylation may still  
364 be related to DME activity, we compared differential methylated regions (DMRs) between  
365 endosperm and embryo in WT and *h2a.x* mutant seeds. There were 4,451 hypo-DMRs  
366 between WT endosperm vs embryo, covering about 1.3 M bps, which reflect the activity of  
367 DME in the central cell. In contrast, 7,526 hypo-DMRs were identified between *h2a.x*  
368 endosperm vs embryo, covering 2.7 M bps in length, more than double the area of the wild-  
369 type hypo-DMRs (Figure 6A). Of these, 4692 (62 %) overlapped with canonical DME DMR  
370 loci (Ibarra et al., 2012). The hypo-DMRs consisted of both WT embryo-endosperm DMRs  
371 (n=3238) and novel *h2a.x* specific DMRs (n = 4357, Figure 7A and B). There was also a  
372 group of WT DMRs, which were only differentially methylated between WT embryo and  
373 endosperm (n=1213). We delineated DMRs by size (0.1 kb->1.5 kb) and found that *h2a.x*  
374 embryo-endosperm DMRs were represented across all size classes (Figure 6C).

375

Figure 6 – Endosperm-Embryo hypomethylated DMR analysis in WT and *h2ax* mutants

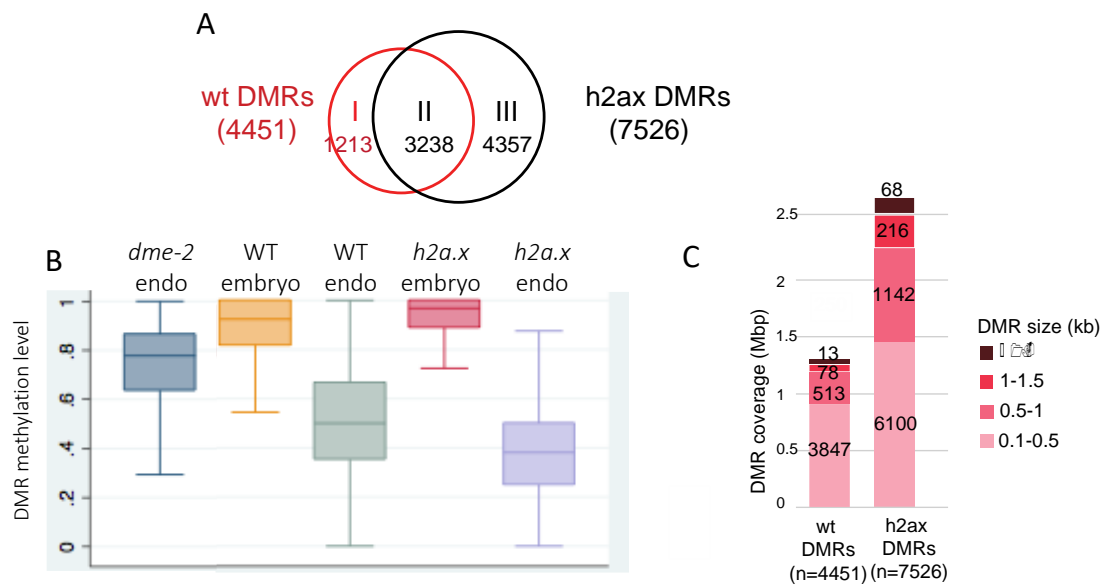

376

377 **Figure 6.** Analysis of *h2ax* methylomes, comparing DMRs between endosperm and embryo. (A) Venn diagram  
 378 illustrating that WT embryo and endosperm harbour 4451 DMRs, the majority of which (3238) are shared with  
 379 *h2ax* embryo and endosperm. *h2ax* embryo and endosperm have an additional 4357 DMRs. (B) Box plots  
 380 showing the relative methylation level of DMRs in embryo and endosperm, in wild type, *h2ax* and *dme-2*  
 381 mutants (C) Characterization of *h2ax*-specific embryo-endosperm DMRs; wild-type and *h2ax* Endosperm-  
 382 Embryo DMRs grouped by size, with the cumulative total length they covered shown, whereby they are  
 383 represented across all DMR sizes, and represent an overall increase in size distribution.

384

### 385 *h2ax* mutant endosperm hypomethylation is not allele-specific

386

387 Seeds are formed following fertilization of both egg and central cell with sperm, resulting in  
 388 the diploid zygote and triploid endosperm, respectively. Since *h2ax* hypomethylation is  
 389 confined to the endosperm, we deduced that this effect may result from a loss of *h2ax* in  
 390 the central cell. Consistent with this idea, both *H2A.X* isoforms are strongly expressed in the  
 391 wild-type central cell (Figure 3C and D). To identify changes in DNA methylation in the  
 392 *h2ax* central cell, we pollinated maternal *h2ax* mutant plants in the Columbia ecotype with  
 393 wild-type *Ler* pollen. We manually-dissected embryo and endosperm from mutant and  
 394 segregating wild-type seeds and following BS-Seq, sorted the reads according to their  
 395 parental ecotype. In this way, the maternal endosperm genome can be used as a proxy for the  
 396 central cell genome. In *h2ax* embryos, both maternal and paternal allele CG methylation is  
 397 identical to WT (peak aligns on zero. Figure 7A), consistent with our observations in self-  
 398 pollinated *h2ax* mutants (Figure 5A). However, in endosperm, a slight shift is visible  
 399 towards the left, indicating mutant hypomethylation, present for both maternal and paternal



400 endosperm (Figure 7B). This indicates that whilst hypomethylation may be inherited from the  
 401 central cell, resulting in hypomethylated maternal alleles, hypomethylation of the paternal  
 402 allele must manifest post-fertilization, perhaps due to a reduction in CG methylation  
 403 efficiency or maintenance. To ascertain which loci were hypomethylated, we again aligned  
 404 our methylomes to the TSS/5' and TTS/3' ends of genes and transposons (Figure 7C-F and  
 405 Supplementary Figure S3A-D). As in the previous analysis, CG methylation in embryo is not  
 406 different from wild-type in *h2a.x* mutant gene and transposon bodies, but both maternal and  
 407 paternal *h2a.x* endosperm alleles are hypomethylated in genes, intergenic regions and TEs,  
 408 with hypomethylation in TE bodies being most striking. CHG methylation is the same in  
 409 wild-type and *h2a.x* mutant embryo and endosperm (Supplementary Figure S3E-H) whereas  
 410 CHH methylation is decreased on both parental end alleles, in both *h2a.x* embryo and endosperm  
 411 (Supplementary Figure S3I-L).

412 *H2A.X* is encoded by two almost identical isoforms, HTA3 and HTA5. To determine  
 413 whether one isoform may have an effect independent of the other, we dissected developing  
 414 seeds from both *hta3/hta3 hta5/+* (*H2A.X-g3*) and *hta3/+ hta5/hta5* mutants (*H2A.X-g5*),  
 415 crossed to Ler, so that the sporophyte had one remaining copy of one of the isoforms, but  
 416 both *H2A.X* isoforms are lost in 1/2 of the gametophytes. Following BS-seq, we determined  
 417 that both isoforms act redundantly, whereby endosperm methylation was not substantially  
 418 affected in either *hta3/hta3 hta5/+* or *hta5/hta5 hta3/+* seeds (Figure 7G, *H2A.X-g3* and  
 419 *H2A.X-g5*, kdensity peaks on zero) compared to hypomethylated *h2a.x* double mutant  
 420 endosperm (Figure 7G, *h2a.x* peak shifted to the left).

Figure 7 – Methylome analysis of seeds from *h2a.x* maternal and WT paternal plant crosses

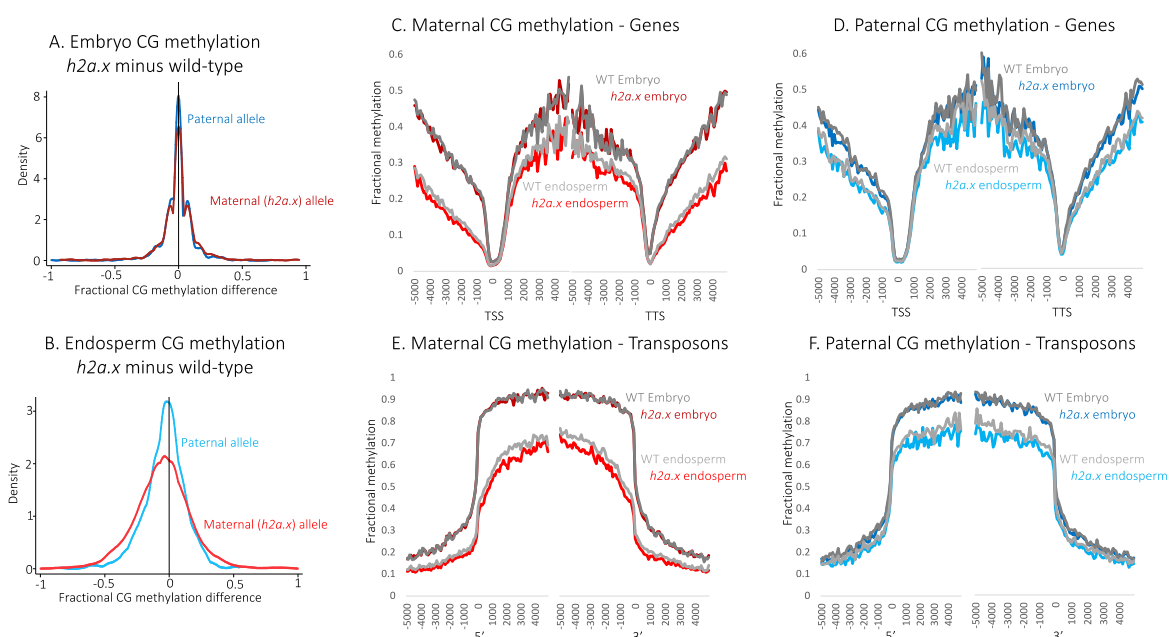

421

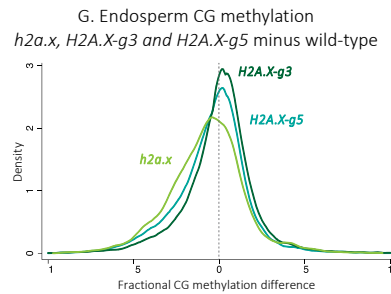

422

423

424

425

426

427

428

429

430

431

432

433

434

435

436

437

438

439

440

441

442

443

444

445

446

447

448

449

450

451

452

453

**Figure 7:** Genome-wide methylation analysis of *h2a.x* mutant developing embryo and endosperm, comparing maternal and paternal alleles in wild-type (WT) and *h2a.x* mutant crosses whereby the maternal allele is either WT Columbia or *h2a.x* homozygous mutant Columbia, and the paternal allele is always wild-type Ler; ‘*h2a.x* paternal’ denotes a wild-type paternal allele now resident in a heterozygous *h2a.x* mutant seed. (A) Fractional methylation difference between *h2a.x* double mutant gametophyte crossed with Ler WT pollen in CG methylation from embryo (linear-bending cotyledon) is plotted, data in 50 bp windows with >10x sequence coverage (B) As for A, but with endosperm. A slight shift towards the left can be seen for the maternal endosperm allele (inherited from *h2a.x* mutant central cell). (C) Ends analysis of maternal (*h2a.x* mutant) genomic methylation in genes, with genes aligned according to their 5’ and 3’ ends. (D) Ends analysis of paternal genomic methylation in genes, with genes aligned according to their 5’ and 3’ ends. (E) Ends analysis of maternal (*h2a.x* mutant) genomic methylation in transposons, with transposons aligned according to their 5’ and 3’ ends. (F) Ends analysis of paternal genomic methylation in transposons, with transposons aligned according to their 5’ and 3’ ends. (G) Fractional CG DNA methylation difference between mutant and WT maternal endosperm in developing seeds from both *hta3/hta3 hta5/+* (*H2A.X-g3*) and *hta5/hta5 hta3/+* mutants (*H2A.X-g5*) were crossed to Ler, so that the sporophyte had one remaining copy of one of the isoforms, but both *H2A.X* isoforms are lost in ½ of the gametophytes. *H2A.X-g5* and *H2A.X-g3* are plotted alongside *h2a.x*. For both *H2A.X-g3* and *H2A.X-g5*, the curve peaks are close to zero, whereas the full *h2a.x* mutant is skewed to the left, indicating redundancy between HTA5 and HTA3 isoforms in the context of mutant endosperm DNA hypomethylation.

### ***h2a.x* hypomethylation is widespread in intergenic DNA**

To assess if *h2a.x* endosperm hypomethylated loci are associated with particular chromatin states, we used the published histone marks and genomic characteristics that topologically group the *Arabidopsis* genome into 9 distinct chromatin states (Sequeira-Mendes et al., 2014) and used them to compare methylation differences between *h2a.x* vs wildtype endosperm. For the hypo-DMRs specific to *h2a.x* endosperm vs embryo, the majority reside in non-coding, intergenic sequences, including distal promoters (chromatin state 4, Figure 8A) and AT-rich heterochromatic regions (chromatin states 8 and 9, Figure 8A), consistent with what we observed in TE metaplots (Figure 5C and D, Figure 6E and F). In addition, when we used fractional methylation differences to analyse the chromatin states

454 of hypomethylated loci unique to the *h2a.x* mutant, i.e. not including those present in  
 455 between wild-type embryo and endosperm, chromatin states 4 and 8 exhibit the largest shift  
 456 (Figure 8B and C). These data indicate that the novel, *h2a.x*-specific DMRs lie primarily in  
 457 chromatin states 4, 8 and 9.

458 In order to characterize the location of *h2a.x* embryo-endosperm DMRs, we plotted their  
 459 co-ordinates across the *Arabidopsis* genome in 300 kb bins (see Materials and Methods;  
 460 Figure 8D). This analysis showed that *h2a.x* DMRs, in general, mirror the distribution of  
 461 wild-type (DME-mediated) embryo-endosperm DMRs, which are enriched in pericentric  
 462 heterochromatin (Figure 8D). To gain further resolution on DMR location, we aligned wild-  
 463 type and *h2a.x* DMR coordinates according to 5' and 3' ends of genes, which revealed that  
 464 *h2a.x* hypomethylation is enriched in intergenic regions, consistent with its enrichment in  
 465 chromatin states 4 and 8 (Figure 8E). To determine whether the *h2a.x* endosperm  
 466 hypomethylation represented novel sites of demethylation, or resulted from increased  
 467 demethylation at already demethylated sites (e.g., resulting in longer DMRs), we took a  
 468 locus-specific approach, using the IGV genome browser to view aligned methylation data and  
 469 DMRs (Figure 8F). The majority of *h2a.x*-specific hypomethylation represented stand-alone,  
 470 novel DMRs (red outline). *h2a.x* DMRs overlapped DME-mediated wild-type  
 471 endosperm/embryo DMRs (green outline), but did not make them longer.

Figure 8 – Chromatin states of *h2a.x* DMRs

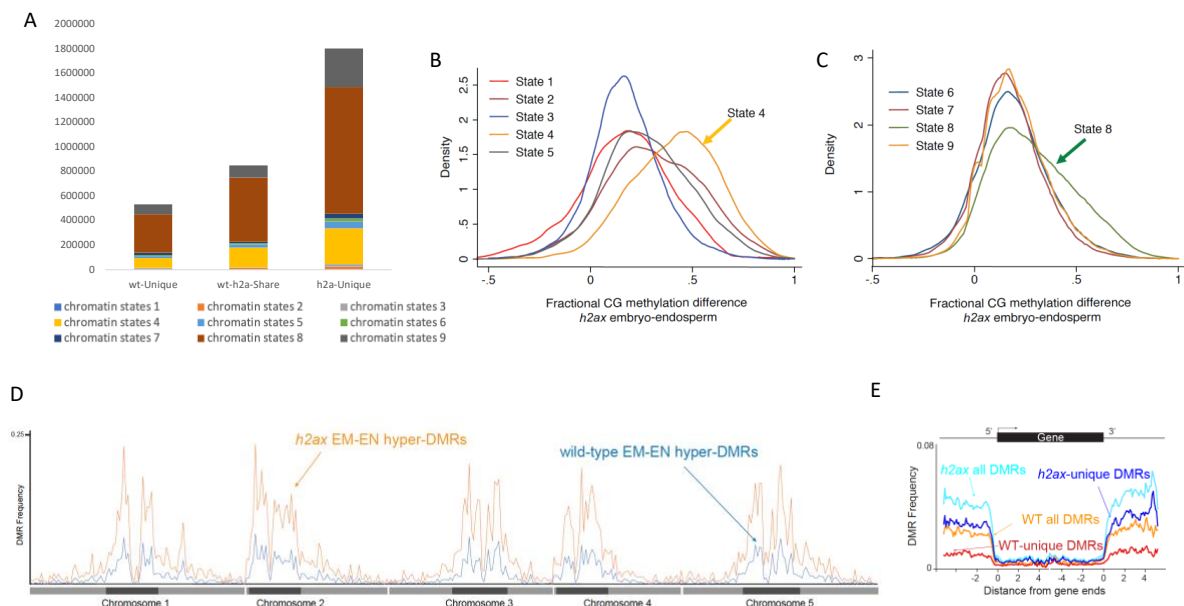

472

473

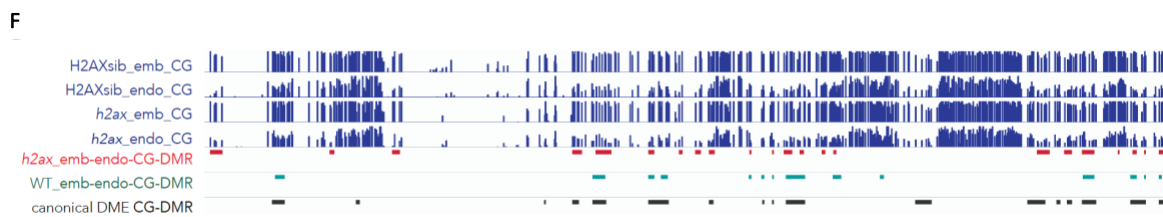

474

475 **Figure 8:** (A) Comparison of the chromatin states comprising each group of DMRs from Figure 6A. Chromatin  
476 state distribution, and the total length they covered, within wt-unique, wt-*h2a.x* shared, and *h2a.x*-unique  
477 Endosperm-Embryo DMRs. States 1 to 7 correspond to euchromatin, and states 8 and 9 correspond to AT- and  
478 GC-rich heterochromatin, respectively. The chromatin states most increased (as a fraction of their total) in *h2a.x*  
479 embryo-endosperm DMRs are 4, 8 and 9. (B and C) Kernel density plots showing the fractional methylation  
480 difference for *h2a.x* mutant embryo minus endosperm, plotted according to chromatin state, demonstrating that  
481 the largest shift to endosperm hypomethylation (i.e. to the right) lies in State 4 (yellow in B) and State 8 (green  
482 in C). (D) Arabidopsis chromosome view of genome-wide methylation levels for *h2a.x* mutant DMRs between  
483 embryo and endosperm, and WT DMRs between embryo and endosperm, represented by the distribution  
484 frequency of DMRs along the 5 chromosomes. Dark blocks represent centromere and peri-centromeric regions  
485 of each chromosome. (E) Ends analysis plot showing distribution frequency of DMRs with respect to coding  
486 genes. Genes were aligned at the 5'- or the 3'-end, and the proportion of genes with DMRs in each 100-bp  
487 interval is plotted. DMR distribution is shown with respect to all wt-DMRs (orange trace), wt-unique DMRs  
488 (red trace), all *h2a.x*-DMRs (cyan trace), and *h2a.x*-unique DMRs (blue trace).  
489 (F) IGV browser view of methylome data and DMR calls for H2AX segregating wild-type embryo and  
490 endosperm (Green), *h2a.x* mutant embryo and endosperm (Red), as well as DMRs identified between *dme-2* /wt  
491 endosperm (Black) (Ibarra et al.,2012).

492

## 493 Discussion

494

495 *H2A.X* is one of the H2A variants in higher eukaryotes and differs from canonical H2A by its  
496 rapid phosphorylation to  $\gamma$ -*H2A.X* in response to DNA double-strand breaks. Unmodified  
497 *H2A.X* is ubiquitously expressed and distributed throughout the genome as a component of  
498 nucleosome core structure, estimated to represent approximately 10 % of H2A variants  
499 present in chromatin at any given time (Rogakou and Sekeri-Pataryas, 1999;Celeste et al.,  
500 2003a;Celeste et al., 2003b;Seo et al., 2012). We show that H2AX is widely expressed in  
501 *Arabidopsis* newly developing tissues and reproductive cells including the companion cells of  
502 the male and female gametophytes. Loss of H2A.X results in endosperm hypomethylation at  
503 intergenic regions, and heterochromatic TEs that include DME target sites, revealing a  
504 potential link between H2AX deposition and DME-mediated DNA demethylation.

505 There are some precedents for H2A variant interactions with DME-like proteins in  
506 *Arabidopsis*: H2A.Z is present at the transcriptional start sites of genes, where it promotes  
507 transcription by preventing DNA methylation (Zilberman et al., 2008). ROS1/DML2/DML3  
508 act to remove DNA methylation in vegetative tissues and are recruited to a subset of their  
509 targets by the IDM1 complex, although they do not directly interact, instead H2A.Z recruits  
510 the DME homologue ROS1 to its targets in vegetative tissues (Nie et al., 2019). This is  
511 reminiscent of the activity of DME in the central cell, where FACT is required for DME  
512 access to certain targets. Evidence exists to suggest that DME and FACT interact directly,  
513 and so may not require intermediary proteins (Frost et al., 2018). Interestingly, our analysis  
514 of promoter DNA methylation at H2A variants showed that the H2A.Z.4 locus may be  
515 regulated by DME in the developing seed (Supplementary Figure S1) (Ibarra et al., 2012; Park  
516 et al., 2016).

517 It was previously shown that the *HTA3* and *HTA5* gene promoters exhibited differences in  
518 activity, with *HTA5* observed to be less active in the floral bud (Yi et al., 2006). Consistent  
519 with this, we show that whilst HTA5 is the predominant protein isoform expressed in the  
520 sporophyte, HTA3 predominates in the developing gametophytes, though both are highly  
521 expressed in pollen. One explanation for H2A3/5 high expression in the vegetative and  
522 central cells is that DME activity creates AP sites during BER, that may lead to the formation  
523 of double strand breaks, thereby requiring high levels of H2A.X (Sczepanski et al., 2010).  
524 Intriguingly, however, in heterochromatin, the mechanism of DNA repair is different; an  
525 H2A.W variant, H2A.W.7 is phosphorylated by ATM to initiate the response in constitutive  
526 heterochromatin to DNA damage (Lorkovic et al., 2017).

527 We observed a significant increase in root hair length in *h2a.x* mutants compared to wild-  
528 type in the absence of any DNA damaging conditions. Intriguingly, reduction in H2A.Z  
529 incorporation into chromatin also results in an increase in root hair length, since the altered  
530 chromatin state mimics phosphate deficiency - activating phosphate deficiency response gene  
531 locus (Deal et al., 2005; Smith et al., 2010). In a similar context, *h2a.x* mutations may  
532 indirectly affect the expression of root hair-growth genes (Won et al., 2009; Hwang et al.,  
533 2017; Mangano et al., 2017). Defective *H2A.X* expression may also cause nutrient-stress,  
534 resulting in the modulation of genes involved in root hair growth.

535 The mechanism of DNA methylation loss in *h2a.x* endosperm remains unclear. Since we  
536 identified hypomethylation on both male and female endosperm alleles, but not in embryo,  
537 hypomethylation must occur post-fertilization in endosperm, at least on the paternal allele.  
538 On the maternal allele, both pre- and post-fertilization DNA methylation dysregulation may

539 be present. Endosperm is a highly unique tissue; it is triploid, and the site of parental  
540 competition for generational resources, in part reflected in the activities of DME and FACT  
541 in the central cell, which confer deep hypomethylation. Endosperm exhibits highly distinct  
542 higher-order chromatin structure compared to other tissues, being less condensed and  
543 subsequently featuring increased trans-interactions, increased expression of TEs, and  
544 encroachment of heterochromatin into euchromatic regions (Baroux et al., 2007; Yadav et al.,  
545 2021). As such, the role of H2A.X in endosperm chromatin may well be distinct from that in  
546 other tissues.

547 Our embryo minus endosperm DMR analyses revealed the following characteristics of  
548 *h2a.x*-specific hypomethylated DMRs: enriched in chromatin states 4, 8 and 9 (Sequeira-  
549 Mendes et al., 2014) and located in TEs, pericentric heterochromatin and intergenic regions.  
550 Chromatin states 4 and 8 are strikingly enriched in intergenic DNA (66.2 and 58.2 %,  
551 respectively, (Sequeira-Mendes et al., 2014). Chromatin state 4 is also characterized by the  
552 presence of histone variants H3.3 and H2A.Z, and high levels of H3K27me3, but is not  
553 highly associated with active transcription. It is also noted to likely contain distal promoters  
554 and regulatory elements. Chromatin states 8 and 9 are highly enriched in TEs, and feature  
555 H3.1, H3K9me2, and H3K27me1, and although state 8 is a transitional, more decondensed  
556 state, they both represent Arabidopsis heterochromatin (Sequeira-Mendes et al., 2014). The  
557 enrichment of DNA hypomethylation of these regions in *h2a.x* mutants is intriguing. Whilst  
558 *h2a.x* hypomethylated DMRs exhibit overlap with DME target sites, they also represent  
559 additional regions not normally demethylated, and their presence in intergenic chromatin and  
560 in heterochromatic TEs may be indicative of normal requirement of H2A.X for DME  
561 exclusion from these regions; that is, to prevent inappropriate remodeling of regulatory DNA  
562 and heterochromatic TEs.

563 Nucleosome cores are crucial for nuclear DNA organization and function, and a complete  
564 loss of *H2A.X* is likely quickly replaced by other H2A variants, such as H2A.Z, H2A.W, or  
565 by canonical H2A. Intriguingly, in human cells, H2A.X phosphorylation increases the  
566 accessibility of chromatin to DNA methylases, (Heo et al., 2008). We therefore speculate  
567 that substitution for other H2A variants in *h2a.x* mutant endosperm contributes to endosperm  
568 hypomethylation, perhaps by allowing DME to access loci normally not permitted.

569 In conclusion, we demonstrate that *H2A.X* is expressed widely in developing *Arabidopsis*  
570 tissues and gamete companion cells, and show that the DNA damage response is impaired in  
571 *h2a.x* mutant roots and seedlings. We show that *h2a.x* mutant endosperm exhibits DNA  
572 hypomethylation at intergenic regions and heterochromatic TEs, creating a large number of

573 embryo-endosperm DMRs, not present in wild-type. We hypothesize that the presence of  
574 H2A.X in endosperm contributes to a chromatin structure that is refractive to DME and  
575 DME-FACT activity, preventing inappropriate DNA demethylation in intergenic and  
576 heterochromatic DNA.

577

#### 578 **Data Availability Statement**

579 The datasets for this study can be found in GEO accession (TBA)

580

#### 581 **Conflict of Interest**

582

583 The authors declare that the research was conducted in the absence of any commercial or  
584 financial relationships that could be construed as a potential conflict of interest.

585

#### 586 **Author Contributions**

587

588 RLF, YC and JMF conceived the project; JMF, JL, PHH, SJHL, YM, MB, AMR, HTC  
589 performed the experiments; JMF, YC, TFH, and RLF analyzed the data; JMF, YC, and RLF  
590 wrote the article with contributions of all the authors. All authors contributed to the article  
591 and approved the submitted version.

592

593

#### 594 **Funding**

595

596 This work was supported by the NIH Grant R01-GM069415 to R.L.F, the National Research  
597 Foundation of Korea Grant 2020R1A2C2009382 and 2021R1A5A1032428 to Y.C., and the  
598 USDA NIFA Hatch 02413 and the NSF MCB-1715115 to T.-F.H. This work was also  
599 supported by the Stadelmann-Lee Scholarship Fund, Seoul National University, to J.L and  
600 Y.M

601

#### 602 **Acknowledgments**

603

604 We thank Christina Wistrom and formerly Barbara Rotz for their management of the  
605 University of California, Berkeley, Oxford Tract greenhouse facility. We are grateful to  
606 Christian Ibarra for his advice on manual endosperm dissection. This work used the Vincent  
607 J. Coates Genomics Sequencing Laboratory at the University of California, Berkeley,  
608 supported by NIH S10 Instrumentation Grants S10RR029668, S10RR027303, and  
609 S10OD018174, and the authors would like to particularly thank Shana McDevitt for her  
610 assistance.

611

612

### 613 **References**

614

615 Baroux, C., Pecinka, A., Fuchs, J., Schubert, I., and Grossniklaus, U. (2007). The triploid  
616 endosperm genome of Arabidopsis adopts a peculiar, parental-dosage-dependent  
617 chromatin organization. *Plant Cell* 19, 1782-1794.

618 Belotserkovskaya, R., Oh, S., Bondarenko, V.A., Orphanides, G., Studitsky, V.M., and  
619 Reinberg, D. (2003). FACT facilitates transcription-dependent nucleosome alteration.  
620 *Science* 301, 1090-1093.

621 Celeste, A., Difilippantonio, S., Difilippantonio, M.J., Fernandez-Capetillo, O., Pilch, D.R.,  
622 Sedelnikova, O.A., Eckhaus, M., Ried, T., Bonner, W.M., and Nussenzweig, A.  
623 (2003a). H2AX haploinsufficiency modifies genomic stability and tumor susceptibility.  
624 *Cell* 114, 371-383.

625 Celeste, A., Fernandez-Capetillo, O., Kruhlak, M.J., Pilch, D.R., Staudt, D.W., Lee, A.,  
626 Bonner, R.F., Bonner, W.M., and Nussenzweig, A. (2003b). Histone H2AX  
627 phosphorylation is dispensable for the initial recognition of DNA breaks. *Nat Cell Biol*  
628 5, 675-679.

629 Choi, Y., Gehring, M., Johnson, L., Hannon, M., Harada, J.J., Goldberg, R.B., Jacobsen, S.E.,  
630 and Fischer, R.L. (2002). DEMETER, a DNA glycosylase domain protein, is required  
631 for endosperm gene imprinting and seed viability in Arabidopsis. *Cell* 110, 33-42.

632 Culligan, K.M., Robertson, C.E., Foreman, J., Doerner, P., and Britt, A.B. (2006). ATR and  
633 ATM play both distinct and additive roles in response to ionizing radiation. *Plant J* 48,  
634 947-961.

635 Dantuma, N.P., and Van Attikum, H. (2016). Spatiotemporal regulation of posttranslational  
636 modifications in the DNA damage response. *EMBO J* 35, 6-23.



- 637 Deal, R.B., Kandasamy, M.K., Mckinney, E.C., and Meagher, R.B. (2005). The nuclear actin-  
638 related protein ARP6 is a pleiotropic developmental regulator required for the  
639 maintenance of FLOWERING LOCUS C expression and repression of flowering in  
640 Arabidopsis. *Plant Cell* 17, 2633-2646.
- 641 Du, L.L., Nakamura, T.M., and Russell, P. (2006). Histone modification-dependent and -  
642 independent pathways for recruitment of checkpoint protein Crb2 to double-strand  
643 breaks. *Genes Dev* 20, 1583-1596.
- 644 Feng, S., Jacobsen, S.E., and Reik, W. (2010). Epigenetic reprogramming in plant and animal  
645 development. *Science* 330, 622-627.
- 646 Formosa, T. (2012). The role of FACT in making and breaking nucleosomes. *Biochim Biophys*  
647 *Acta* 1819, 247-255.
- 648 Frost, J.M., Kim, M.Y., Park, G.T., Hsieh, P.H., Nakamura, M., Lin, S.J.H., Yoo, H., Choi, J.,  
649 Ikeda, Y., Kinoshita, T., Choi, Y., Zilberman, D., and Fischer, R.L. (2018). FACT  
650 complex is required for DNA demethylation at heterochromatin during reproduction in  
651 Arabidopsis. *Proc Natl Acad Sci U S A* 115, E4720-E4729.
- 652 Gehring, M., Huh, J.H., Hsieh, T.F., Penterman, J., Choi, Y., Harada, J.J., Goldberg, R.B., and  
653 Fischer, R.L. (2006). DEMETER DNA glycosylase establishes MEDEA polycomb  
654 gene self-imprinting by allele-specific demethylation. *Cell* 124, 495-506.
- 655 Heo, K., Kim, H., Choi, S.H., Choi, J., Kim, K., Gu, J., Lieber, M.R., Yang, A.S., and An, W.  
656 (2008). FACT-mediated exchange of histone variant H2AX regulated by  
657 phosphorylation of H2AX and ADP-ribosylation of Spt16. *Mol Cell* 30, 86-97.
- 658 Hsieh, T.F., Ibarra, C.A., Silva, P., Zemach, A., Eshed-Williams, L., Fischer, R.L., and  
659 Zilberman, D. (2009). Genome-wide demethylation of Arabidopsis endosperm. *Science*  
660 324, 1451-1454.
- 661 Hwang, Y., Choi, H.S., Cho, H.M., and Cho, H.T. (2017). Tracheophytes Contain Conserved  
662 Orthologs of a Basic Helix-Loop-Helix Transcription Factor That Modulate ROOT  
663 HAIR SPECIFIC Genes. *Plant Cell* 29, 39-53.
- 664 Ibarra, C.A., Feng, X., Schoft, V.K., Hsieh, T.F., Uzawa, R., Rodrigues, J.A., Zemach, A.,  
665 Chumak, N., Machlicova, A., Nishimura, T., Rojas, D., Fischer, R.L., Tamaru, H., and  
666 Zilberman, D. (2012). Active DNA demethylation in plant companion cells reinforces  
667 transposon methylation in gametes. *Science* 337, 1360-1364.
- 668 Ikeda, Y., Kinoshita, Y., Susaki, D., Ikeda, Y., Iwano, M., Takayama, S., Higashiyama, T.,  
669 Kakutani, T., and Kinoshita, T. (2011). HMG domain containing SSRP1 is required for  
670 DNA demethylation and genomic imprinting in Arabidopsis. *Dev Cell* 21, 589-596.

- 671 Kim, M., Ohr, H., Lee, J.W., Hyun, Y., Fischer, R.L., and Choi, Y. (2008). Temporal and  
672 Spatial Downregulation of Arabidopsis MET1 Activity Results in Global DNA  
673 Hypomethylation and Developmental Defects. *Molecules and Cells* 26, 611-615.
- 674 Kotogany, E., Dudits, D., Horvath, G.V., and Ayaydin, F. (2010). A rapid and robust assay for  
675 detection of S-phase cell cycle progression in plant cells and tissues by using ethynyl  
676 deoxyuridine. *Plant Methods* 6, 5.
- 677 Law, J.A., and Jacobsen, S.E. (2010). Establishing, maintaining and modifying DNA  
678 methylation patterns in plants and animals. *Nat Rev Genet* 11, 204-220.
- 679 Lee, S.H., and Cho, H.T. (2006). PINOID positively regulates auxin efflux in Arabidopsis root  
680 hair cells and tobacco cells. *Plant Cell* 18, 1604-1616.
- 681 Lorkovic, Z.J., Park, C., Goiser, M., Jiang, D., Kurzbauer, M.T., Schlogelhofer, P., and Berger,  
682 F. (2017). Compartmentalization of DNA Damage Response between Heterochromatin  
683 and Euchromatin Is Mediated by Distinct H2A Histone Variants. *Current Biology* 27,  
684 1192-1199.
- 685 Mangano, S., Denita-Juarez, S.P., Choi, H.S., Marzol, E., Hwang, Y., Ranocha, P., Velasquez,  
686 S.M., Borassi, C., Barberini, M.L., Aptekmann, A.A., Muschietti, J.P., Nadra, A.D.,  
687 Dunand, C., Cho, H.T., and Estevez, J.M. (2017). Molecular link between auxin and  
688 ROS-mediated polar growth. *Proc Natl Acad Sci U S A* 114, 5289-5294.
- 689 Min, Y., Frost, J.M., and Choi, Y. (2019). Nuclear Chaperone ASF1 is Required for  
690 Gametogenesis in Arabidopsis thaliana. *Scientific Reports* 9, 13959.
- 691 Monk, M., Boubelik, M., and Lehnert, S. (1987). Temporal and regional changes in DNA  
692 methylation in the embryonic, extraembryonic and germ cell lineages during mouse  
693 embryo development. *Development* 99, 371-382.
- 694 Nie, W.F., Lei, M., Zhang, M., Tang, K., Huang, H., Zhang, C., Miki, D., Liu, P., Yang, Y.,  
695 Wang, X., Zhang, H., Lang, Z., Liu, N., Xu, X., Yelagandula, R., Zhang, H., Wang, Z.,  
696 Chai, X., Andreucci, A., Yu, J.Q., Berger, F., Lozano-Duran, R., and Zhu, J.K. (2019).  
697 Histone acetylation recruits the SWR1 complex to regulate active DNA demethylation  
698 in Arabidopsis. *Proc Natl Acad Sci U S A* 116, 16641-16650.
- 699 Papareddy, R.K., Paldi, K., Paulraj, S., Kao, P., Lutzmayer, S., and Nodine, M.D. (2020).  
700 Chromatin regulates expression of small RNAs to help maintain transposon methylome  
701 homeostasis in Arabidopsis. *Genome Biol* 21, 251.
- 702 Park, J.S., Frost, J.M., Park, K., Ohr, H., Park, G.T., Kim, S., Eom, H., Lee, I., Brooks, J.S.,  
703 Fischer, R.L., and Choi, Y. (2017). Control of DEMETER DNA demethylase gene

- 704 transcription in male and female gamete companion cells in *Arabidopsis thaliana*. *Proc*  
705 *Natl Acad Sci U S A* 114, 2078-2083.
- 706 Park, K., Kim, M.Y., Vickers, M., Park, J.S., Hyun, Y., Okamoto, T., Zilberman, D., Fischer,  
707 R.L., Feng, X., Choi, Y., and Scholten, S. (2016). DNA demethylation is initiated in  
708 the central cells of *Arabidopsis* and rice. *Proc Natl Acad Sci U S A* 113, 15138-15143.
- 709 Parrilla-Doblas, J.T., Roldan-Arjona, T., Ariza, R.R., and Cordoba-Canero, D. (2019). Active  
710 DNA Demethylation in Plants. *Int J Mol Sci* 20.
- 711 Piquet, S., Le Parc, F., Bai, S.K., Chevallier, O., Adam, S., and Polo, S.E. (2018). The Histone  
712 Chaperone FACT Coordinates H2A.X-Dependent Signaling and Repair of DNA  
713 Damage. *Mol Cell* 72, 888-901 e887.
- 714 Rogakou, E.P., and Sekeri-Pataryas, K.E. (1999). Histone variants of H2A and H3 families are  
715 regulated during in vitro aging in the same manner as during differentiation. *Exp*  
716 *Gerontol* 34, 741-754.
- 717 Schoft, V.K., Chumak, N., Choi, Y., Hannon, M., Garcia-Aguilar, M., Machlicova, A., Slusarz,  
718 L., Mosiolek, M., Park, J.S., Park, G.T., Fischer, R.L., and Tamaru, H. (2011). Function  
719 of the DEMETER DNA glycosylase in the *Arabidopsis thaliana* male gametophyte.  
720 *Proc Natl Acad Sci U S A* 108, 8042-8047.
- 721 Szczepanski, J.T., Wong, R.S., Mcknight, J.N., Bowman, G.D., and Greenberg, M.M. (2010).  
722 Rapid DNA-protein cross-linking and strand scission by an abasic site in a nucleosome  
723 core particle. *Proc Natl Acad Sci U S A* 107, 22475-22480.
- 724 Seo, J., Kim, S.C., Lee, H.S., Kim, J.K., Shon, H.J., Salleh, N.L., Desai, K.V., Lee, J.H., Kang,  
725 E.S., Kim, J.S., and Choi, J.K. (2012). Genome-wide profiles of H2AX and gamma-  
726 H2AX differentiate endogenous and exogenous DNA damage hotspots in human cells.  
727 *Nucleic Acids Res* 40, 5965-5974.
- 728 Sequeira-Mendes, J., Araguez, I., Peiro, R., Mendez-Giraldez, R., Zhang, X., Jacobsen, S.E.,  
729 Bastolla, U., and Gutierrez, C. (2014). The Functional Topography of the *Arabidopsis*  
730 Genome Is Organized in a Reduced Number of Linear Motifs of Chromatin States.  
731 *Plant Cell* 26, 2351-2366.
- 732 Smith, A.P., Jain, A., Deal, R.B., Nagarajan, V.K., Poling, M.D., Raghothama, K.G., and  
733 Meagher, R.B. (2010). Histone H2A.Z regulates the expression of several classes of  
734 phosphate starvation response genes but not as a transcriptional activator. *Plant Physiol*  
735 152, 217-225.
- 736 Waterworth, W.M., Wilson, M., Wang, D., Nuhse, T., Warward, S., Selley, J., and West, C.E.  
737 (2019). Phosphoproteomic analysis reveals plant DNA damage signalling pathways

738 with a functional role for histone H2AX phosphorylation in plant growth under  
739 genotoxic stress. *Plant J* 100, 1007-1021.

740 Won, S.K., Lee, Y.J., Lee, H.Y., Heo, Y.K., Cho, M., and Cho, H.T. (2009). Cis-element- and  
741 transcriptome-based screening of root hair-specific genes and their functional  
742 characterization in Arabidopsis. *Plant Physiol* 150, 1459-1473.

743 Wu, X., and Zhang, Y. (2017). TET-mediated active DNA demethylation: mechanism,  
744 function and beyond. *Nat Rev Genet* 18, 517-534.

745 Xiao, W., Gehring, M., Choi, Y., Margossian, L., Pu, H., Harada, J.J., Goldberg, R.B., Pennell,  
746 R.I., and Fischer, R.L. (2003). Imprinting of the MEA Polycomb gene is controlled by  
747 antagonism between MET1 methyltransferase and DME glycosylase. *Dev Cell* 5, 891-  
748 901.

749 Yadav, K., Garoff, L., Huseby, D.L., and Hughes, D. (2021). Phenotypic and genetic barriers  
750 to establishment of horizontally transferred genes encoding ribosomal protection  
751 proteins. *J Antimicrob Chemother.*

752 Yi, H., Sardesai, N., Fujinuma, T., Chan, C.W., Veena, and Gelvin, S.B. (2006). Constitutive  
753 expression exposes functional redundancy between the Arabidopsis histone H2A gene  
754 HTA1 and other H2A gene family members. *Plant Cell* 18, 1575-1589.

755 Zilberman, D., Coleman-Derr, D., Ballinger, T., and Henikoff, S. (2008). Histone H2A.Z and  
756 DNA methylation are mutually antagonistic chromatin marks. *Nature* 456, 125-129.

757

758

759

## 760 **Supplementary Materials**

761

### 762 **Supplementary Figure S1. Analysis of CG DNA methylation at H2A variant genomic** 763 **loci in WT (Col-0) and *dme-2* mutant Arabidopsis.**

764 (A) *HTA3* (H2A.X). (B) *HTA5* (H2A.X). (C) *HTA4* (H2A.Z). CC = Central cells (Park et  
765 al., 2016), Endo = Endosperm (Hsieh et al., 2009). Transcription start site and promoter  
766 regions are highlighted with orange box. All cytosine methylations are included without read  
767 cutoff. All bars of histogram indicate the methylation % level of single cytosine. Bismark  
768 was used for bisulphite sequencing data read alignment and Seqmonk was used for  
769 visualization.

770

771 **Supplementary Figure S2. Genome-wide non-CG methylation analysis of *h2a.x* mutant**  
772 **developing embryo, endosperm and seedling.**

773 Ends analysis of selfed *h2a.x* mutant and segregating WT genomic CHG methylation in  
774 genes (A) and TEs (B), as well as CHH methylation in genes (C) and TEs (D), with those  
775 aligned according to their 5' and 3' ends. Data for seedling, endosperm and embryo (linear-  
776 bending cotyledon) are shown. Endosperm and embryo are hypomethylated at CHH at gene  
777 edges and in TEs. Since embryo CHH methylation levels are incredibly sensitive to  
778 gestational age, they may be indicative of slightly later dissection of WT for this sample.

779

780 **Supplementary Figure S3. Allele-specific genome-wide CG methylation analysis of**  
781 ***h2a.x* mutant developing embryo and endosperm.**

782 Female WT Col-0 or *h2a.x* homozygous mutants were crossed with WT Ler pollen and the  
783 methylation levels in F1 seeds were analyzed. '*h2a.x* paternal' denotes a WT paternal allele  
784 now resident in a heterozygous *h2a.x* mutant seed. Ends analysis of embryo and endosperm  
785 CG genomic methylation in genes (A and B, respectively) as well as those in TEs (C and D,  
786 respectively) are shown, with genes and TEs aligned according to their 5' and 3' ends. The  
787 maternal *h2a.x* endosperm allele is hypomethylated compared to WT. Ends analysis of  
788 embryo and endosperm CHG genomic methylation in genes (E and F, respectively) as well as  
789 those in TEs (G and H, respectively) are shown, with genes and TEs aligned according to  
790 their 5' and 3' ends. Ends analysis of embryo and endosperm CHH genomic methylation in  
791 genes (I and J, respectively) as well as those in TEs (K and L, respectively) are shown, with  
792 genes and TEs aligned according to their 5' and 3' ends. CHH methylation in genes at  
793 intergenic regions is decreased on both *h2a.x* endosperm alleles compared to WT. CHH  
794 methylation in TE bodies is decreased on both *h2a.x* embryo and endosperm alleles  
795 compared to WT.
